# Supplementary material for: Sensitive detection of microRNA by dynamic light scattering based on DNAzyme walker-mediated AuNPs self-assembly
Source: Royal Society of Chemistry journal article supplement (doi:10.1039/d3dt02450d), 2023-01-01
Supplement: d3dt02450d1.pdf [file d3dt02450d1.pdf]

**Sensitive detection of microRNA by dynamic light scattering based  
on DNzyme Walker - mediated AuNPs self-assembly**

Haiyun Liu<sup>a,#,\*</sup>, Na Ren<sup>a,#</sup>, Yi Gao<sup>a</sup>, Tingfan Wu<sup>a</sup>, Boren Sui<sup>a</sup>, Zhen Liu<sup>a</sup>, Bin Chang<sup>a</sup>,  
Man Haung<sup>a</sup>, Hong Liu<sup>a,b</sup>

*<sup>a</sup> Collaborative Innovation Center of Technology and Equipment for Biological  
Diagnosis and Therapy in Universities of Shandong, Institute for Advanced  
Interdisciplinary Research(iAIR), University of Jinan, Jinan 250022, P.R. China*

*<sup>b</sup> State Key Laboratory of Crystal Materials, Shandong University, Jinan 250100, PR  
China*

Corresponding author: Haiyun Liu ([chm\\_liuhy@ujn.edu.cn](mailto:chm_liuhy@ujn.edu.cn))

#These authors contributed equally to this work.

---

## Table of contents

Fig.S1 Elemental analysis experiments of AuNPs.....S-3

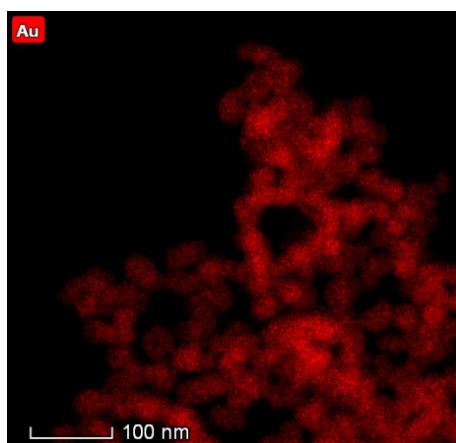

Fig.S1 Elemental analysis experiments of AuNPs. It can be observed that the synthesized sample contains gold element and is evenly distributed.
